# Supplementary material for: Expression Analysis of Lipocalin 2 (LCN2) in Reproductive and Non-Reproductive Tissues of Esr1-Deficient Mice
Source: MDPI journal article supplement (doi:10.3390/ijms24119280), 2023-05-25
Supplement: s1 [file s1]

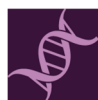

Supplements

# Expression Analysis of Lipocalin 2 (LCN2) in Reproductive and Non-Reproductive Tissues of *Esr1*-Deficient Mice

Jan C. Kessel, Ralf Weiskirchen \* and Sarah K. Schröder \*

**Table S1.** Estrous cycle-staging based on histological features

|        | Histological feature    | Proestrus            | Estrus              | Metestrus           | Diestrus            |
|--------|-------------------------|----------------------|---------------------|---------------------|---------------------|
| Vagina | Mitosis                 | ↑ - ↑↑               | ↑                   | 0                   | 0 - ↑               |
|        | Apoptosis               | 0                    | 0 - ↑               | ↑↑                  | 0                   |
|        | Desquamation            | 0                    | 0 - ↑               | ↑↑↑                 | 0                   |
|        | Cornified epithelia     | ↑ - ↑↑               | ↑↑ - ↑↑↑            | 0                   | 0 - ↑               |
|        | Mucus layer             | ↑                    | ↑ - ↑↑              | 0                   | 0 - ↑               |
|        | Stratum Granulosum      | ↑                    | ↑                   | 0                   | 0 - ↑               |
| Uterus | Mitosis                 | ↑↑ - ↑↑↑             | 0 - ↑               | 0 - ↑               | ↑                   |
|        | Apoptosis               | 0 - ↑                | ↑↑ - ↑↑↑            | ↑↑↑                 | 0 - ↑               |
|        | Epithelia               | cuboidal - columnar  | columnar            | columnar - cuboidal | cuboidal            |
|        | Pseudostratification    | ↑↑ - ↑↑↑             | ↑↑ - ↑↑↑            | ↑ - ↑↑              | 0                   |
|        | Stromal edema           | ↑                    | 0 - ↑               | 0                   | 0 - ↑               |
|        | Leukocyte infiltration  | 0 - ↑                | ↑↑ - ↑↑↑            | ↑↑ - ↑↑↑            | 0 - ↑               |
|        | Dilated lumen           | ↑↑ - ↑↑↑             | ↑↑ - ↑↑↑            | ↑ - ↑↑              | 0                   |
| Ovary  | Basophilic c.l.         | from previous cycles | ↑↑↑                 | ↑↑                  | ↑                   |
|        | Eosinophilic c.l.       | from previous cycles | from previous cycle | ↑                   | ↑↑↑                 |
|        | Degenerating c.l.       | ↑↑↑                  | ↑                   | from previous cycle | from previous cycle |
|        | Fibrotic tissue in c.l. | ↑                    | 0                   | 0                   | ↑                   |
|        | Oocytes in oviduct      | 0                    | ↑                   | 0                   | 0                   |

Abbreviations: c.l., corpus luteum; 0, no expression; ↑, low expression; ↑↑, moderate expression; ↑↑↑, strong expression.

**Table S2:** Antibodies used for protein analysis

| Protein                                       | Dilution | Clonality/Host | Company                                         | Catalog No. |
|-----------------------------------------------|----------|----------------|-------------------------------------------------|-------------|
| <b>Primary antibodies (Western blot)</b>      |          |                |                                                 |             |
| GAPDH                                         | 1:1,000  | mono, mouse    | Santa Cruz Biotechnology, Dallas, TX, USA       | sc-32233    |
| $\beta$ -actin                                | 1:10,000 | mono, mouse    | Sigma-Aldrich, Taufkirchen, Germany             | A5441       |
| Vinculin                                      | 1:1,000  | mono, mouse    | ProteinTech® GmbH, Planegg-Martinsried, Germany | 66305-1-Ig  |
| Transferrin                                   | 1:1,000  | poly, rabbit   | ProteinTech® GmbH                               | 17435-1-AP  |
| ER $\alpha$ (6F11)                            | 1:1,000  | poly, mouse    | Thermo Fisher Scientific, Waltham, MA, USA      | MA1-27107   |
| LCN2                                          | 1:800    | poly, goat     | R&D Systems, Minneapolis, MN, USA               | AF3508      |
| STAR                                          | 1:1,000  | poly, rabbit   | ProteinTech® GmbH                               | 12225-1-AP  |
| <b>Secondary antibodies (Western blot)</b>    |          |                |                                                 |             |
| goat anti-rabbit IgG (H+L), HRP               | 1:5,000  | poly, goat     | Thermo Fisher Scientific                        | 31460       |
| goat anti-mouse IgG (H+L), HRP                | 1:5,000  | poly, goat     | Thermo Fisher Scientific                        | 31430       |
| mouse anti-goat IgG (H+L), HRP                | 1:5,000  | poly, mouse    | Thermo Fisher Scientific                        | 31400       |
| <b>Secondary antibodies (IF and IHC)</b>      |          |                |                                                 |             |
| Donkey anti-goat IgG (H+L) Alexa Fluor™ 488   | 1:300    | poly, donkey   | Thermo Fisher Scientific                        | A-11055     |
| Donkey anti-rabbit IgG (H+L) Alexa Fluor™ 555 | 1:300    | poly, donkey   | Thermo Fisher Scientific                        | A-31572     |
| Rabbit anti-mouse IgG biotinylated            | 1:200    | poly, rabbit   | DAKO Agilent Technologies, Santa Clara, CA, USA | P026002-2   |
| Rabbit anti-goat IgG biotinylated             | 1:300    | poly, rabbit   | DAKO Agilent Technologies                       | P044901-2   |

---

Abbreviations: poly, polyclonal; mono, monoclonal; IF, immunofluoresence; IHC, immunohistochemistry.

**Table S3.** Primers used for RT-qPCR

| Mouse Gene   | Accession No.  | Primer (5'→3')                                                             |
|--------------|----------------|----------------------------------------------------------------------------|
| <i>Actb</i>  | NM_007393.5    | For: 5'-ctctagacttcgagcaggagatgg-3'<br>Rev: 5'-atgccacaggattccataccaaga-3' |
| <i>Esr1</i>  | NM_007956.5    | For: 5'-tgccgtgtgcaatgactatg-3'<br>Rev: 5'-tttcatcatgccacttcgt-3'          |
| <i>Il1b</i>  | NM_008361.4    | For: 5'-gagctgaaagctctccacctc-3'<br>Rev: 5'-ctttcctttgaggcccaaggc-3'       |
| <i>Itgam</i> | NM_001082960.1 | For: 5'-caatagccagcctcagtgc-3'<br>Rev: 5'-gagcccaggggagaagtg-3'            |
| <i>Lcn2</i>  | NM_008491.1    | For: 5'-ccatctatgagctacaagagaacaat-3'<br>Rev: 5'-tctgatccagtagcgacagc-3'   |
| <i>Mpo</i>   | NM_010824.2    | For: 5'-gatggaatggggagaagctc-3'<br>Rev: 5'-gcaggtagtcccggtagtg-3'          |
| <i>Rps6</i>  | NM_009096.3    | For: 5'-cccatgaagcaaggtgttct-3'<br>Rev: 5'-acaatgcatccacgaacaga-3'         |
| <i>Star</i>  | NM_011485.5    | For: 5'-gaggttcacctgtgtgctg-3'<br>Rev: 5'-caggtggttggcgaactcta-3'          |
| <i>Tnf</i>   | NM_013693.3    | For: 5'-accacgctcttctgtctactga-3'<br>Rev: 5'-tccacttggtggttgctacg-3'       |

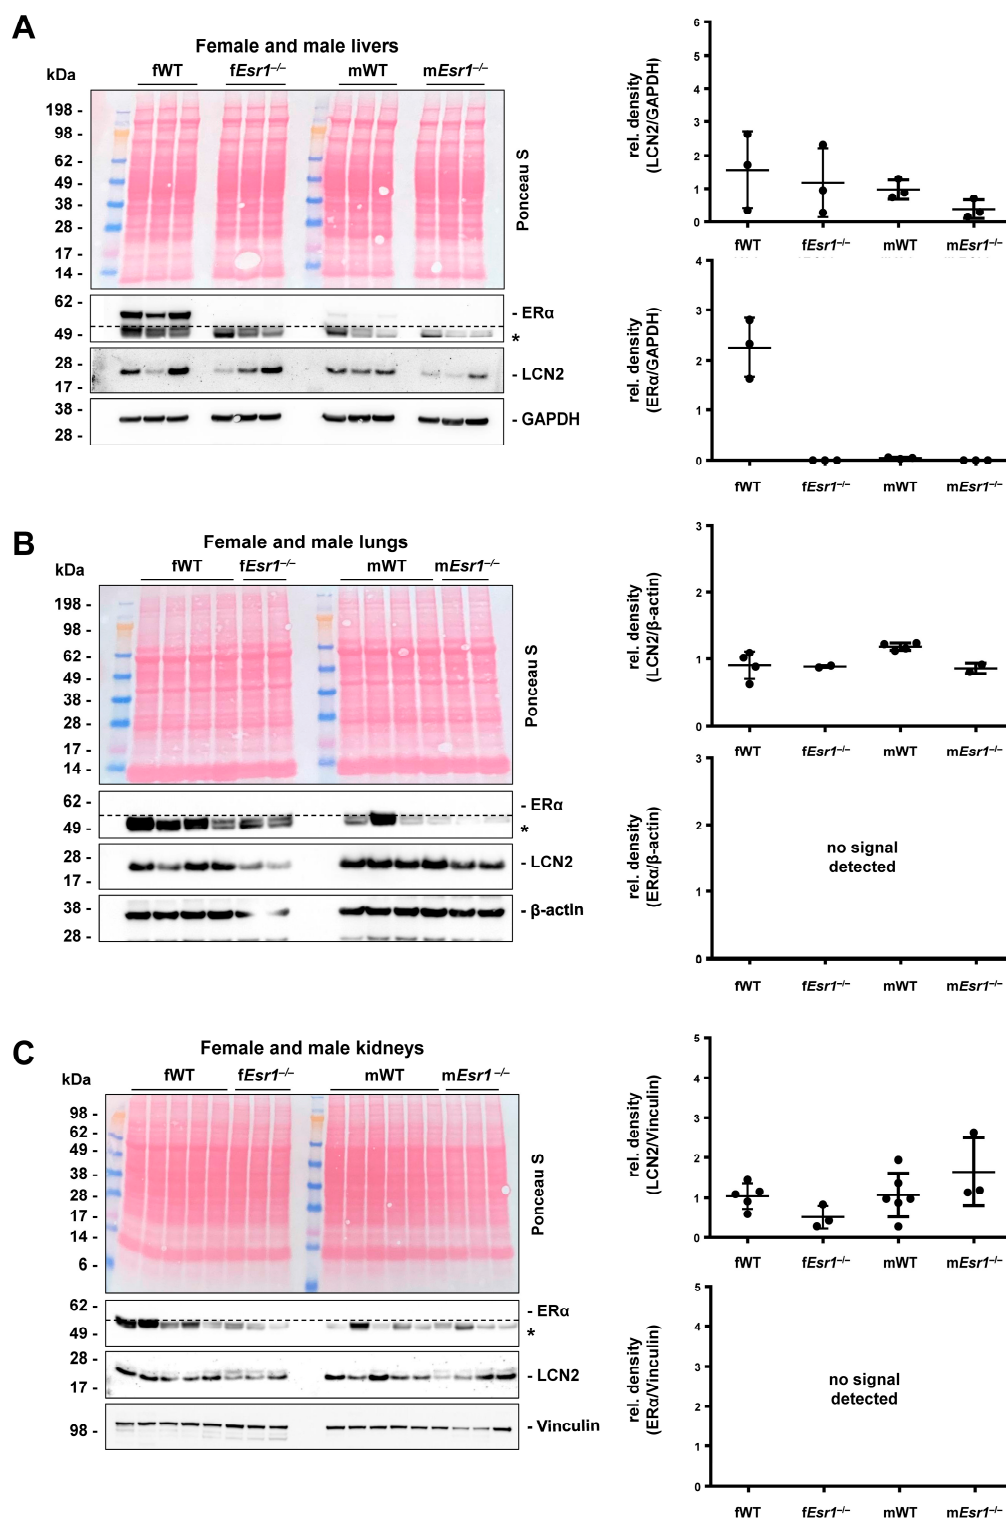

**Figure S1.** Representative Western blot analysis of non-reproductive organs. Tissue samples from (A) livers (wild type (WT):  $n=3$ ,  $Esr1^{-/-}$ :  $n=3$ ), (B) lungs (WT:  $n=4$ ,  $Esr1^{-/-}$ :  $n=2$ ), and (C) kidneys (WT:  $n=5$ ,  $Esr1^{-/-}$ :  $n=3$ ) of female (f) and male (m) animals were dissected and prepared for Western blot analysis and probed for expression of LCN2 and ERα. Expression of GAPDH (livers), β-actin (lungs), vinculin (kidneys), and Ponceau S stainings were used to demonstrate equal protein loading. Unspecific bands are marked with asterisks (\*) and are separated from specific bands by dashed lines. Protein expression of LCN2 was quantified densitometrically and plotted relative to the expression of the loading control. Data are displayed as means  $\pm$  SD.

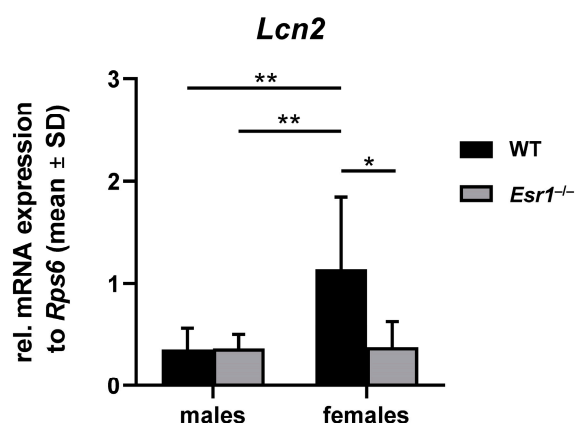

**Figure S2.** Hepatic *Lcn2* mRNA expression. Liver mRNA from wild type (WT) (female n=9, male n=8) and *Esr1*-knockout (female n=6, male n=8) mice were prepared and the expression of *Lcn2* was analysed by RT-qPCR. In case of normal distribution Student's *t*-test was chosen for statistical analysis, otherwise a Mann-Whitney test was performed. Significant differences between groups are marked with asterisks: \*  $p < 0.05$ , \*\*  $p < 0.01$ . Data are displayed as means  $\pm$  SD.

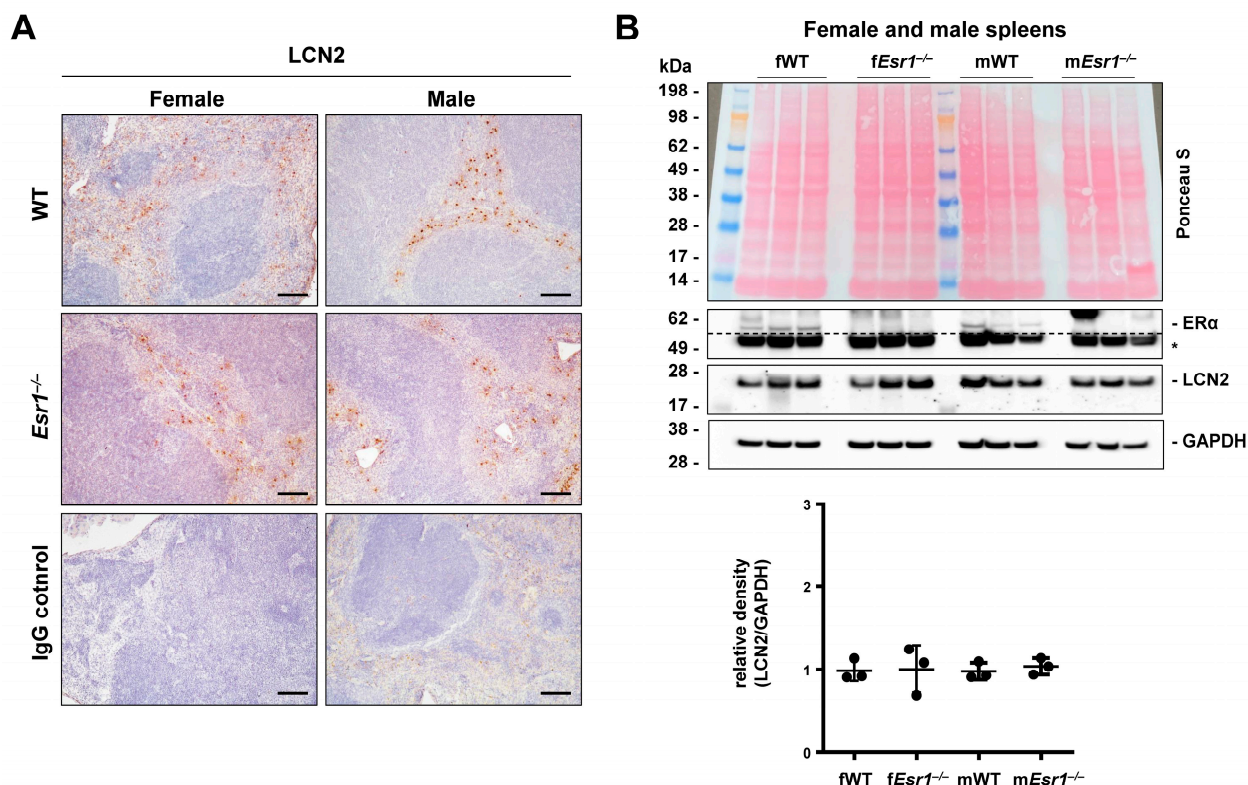

**Figure S3.** LCN2 expression in spleen. Spleen tissue samples from wild type (WT, female: n=3, male: n=3) and *Esr1*-knockout (female: n=3, male: n=3) mice were either embedded in paraffin for immunostaining or processed for protein analysis. (A) Immunohistochemical detection of LCN2 was performed in spleen tissues. Isotype-negative IgG controls were used to demonstrate antibody's specificity. Magnifications: 100x, scale bars: 100  $\mu$ m. (B) Spleen samples were analysed by Western blot analysis for LCN2 and ER $\alpha$  protein expression. Expression of GAPDH and Ponceau S stain were used as a loading control. Unspecific bands are marked with asterisks (\*) and are separated from specific bands by dashed lines. Protein expression of LCN2 was quantified densitometrically and plotted relative to GAPDH expression. Data are displayed as means  $\pm$  SD.

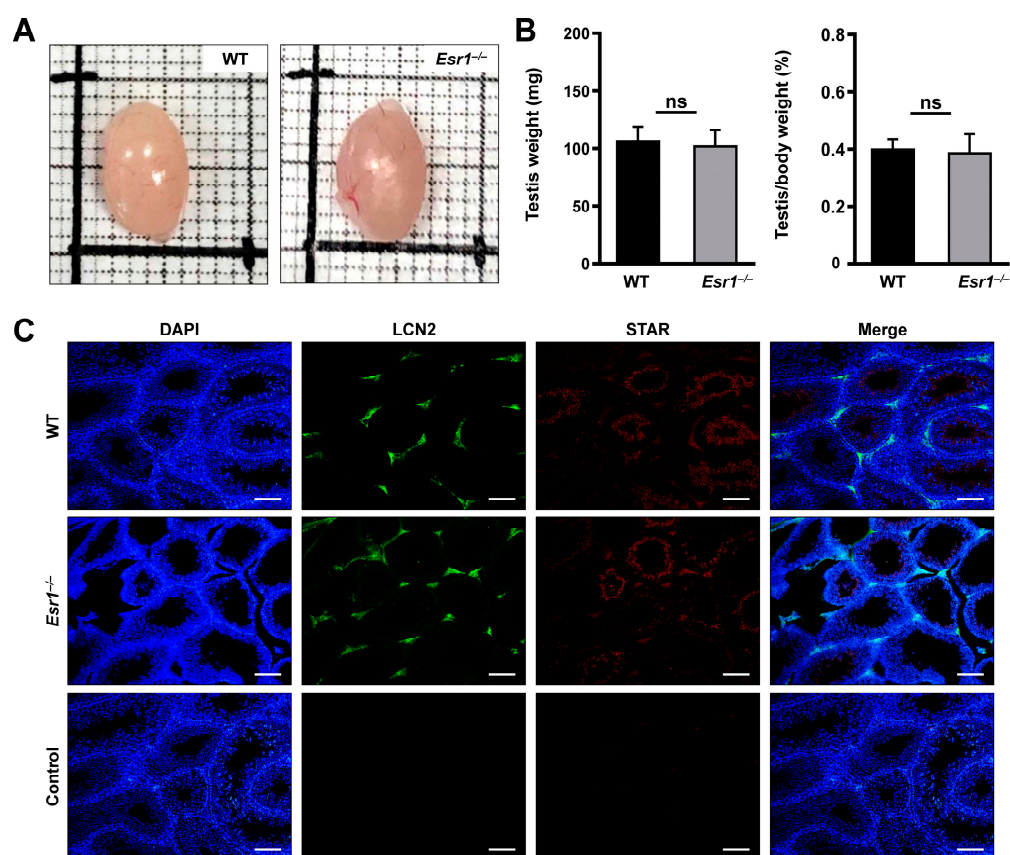

**Figure S4.** Testes weights of wild type (WT) and *Esr1*-depleted mice. **(A)** Testes were dissected from adult WT ( $n = 8$ ) and *Esr1*<sup>-/-</sup> males ( $n = 8$ ) and placed on scale paper to examine phenotypic appearance. **(B)** Total testes weights were measured. Testis-to-body weight ratios were calculated for each genotype and are shown in percentage. For statistical analysis, a Student's *t*-test was performed. Data are displayed as means  $\pm$  SD and non-significant results are marked with ns. **(C)** Tissue samples were subjected to immunofluorescence-double-staining for LCN2 and steroidogenic acute regulatory protein (STAR) using DAPI as a counterstain. Magnifications: 100x, scale bars: 100  $\mu$ m.



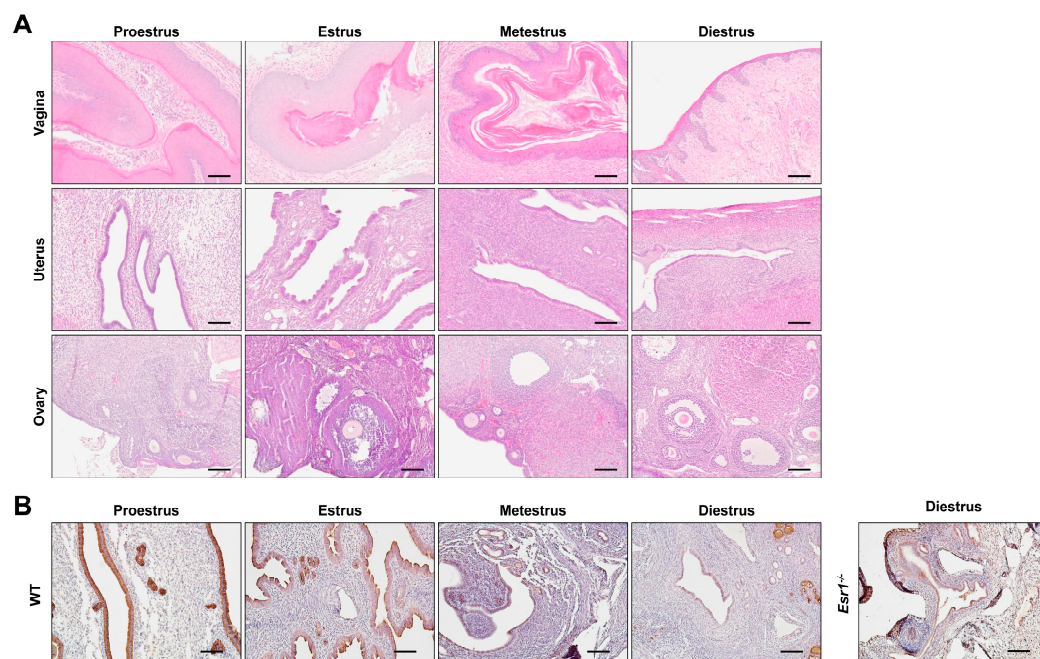

**Figure S5.** Determination of estrous phases as determined by histological examination. Reproductive tracts from female wild type (WT, n=8) and *Esr1*<sup>-/-</sup> mice (n=6) were dissected and embedded in paraffin for further analysis staining. **(A)** Histological features in major female reproductive organs (vagina, uterus, and ovary) were hematoxylin and eosin stained to determine the estrous cycle phase. Magnifications: 10x, scale bars: 100  $\mu$ m. **(B)** Immunohistochemical detection of LCN2 protein expression in WT and *Esr1*<sup>-/-</sup> uterine tissues. Since *Esr1*-deficient animals do not develop different estrous phases but are in a constant diestrus phase, this is only shown in a single representative staining. Magnifications: 100x, scale bars: 100  $\mu$ m.

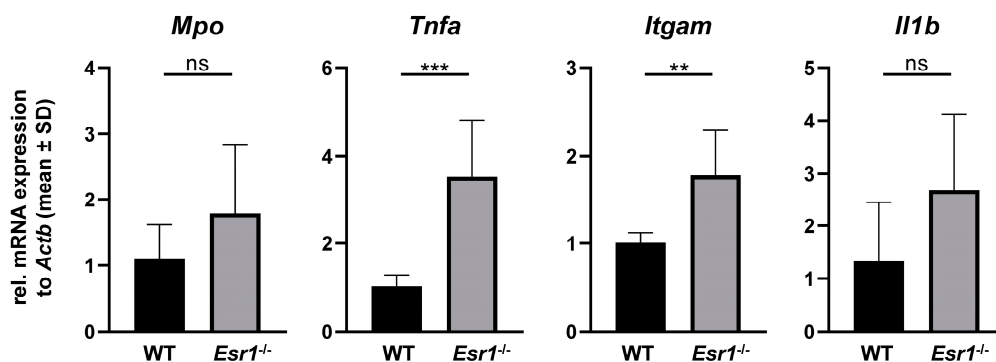

**Figure S6.** Detection of inflammatory markers in ovarian tissue by RT-qPCR. Ovaries from female wild type (WT, n=8) and *Esr1*-knockout mice (n=6) were dissected, prepared for RNA analysis, and the expression of several inflammatory markers analysed by RT-qPCR (myeloperoxidase, *Mpo*; interleukin-1 $\beta$ , *Il-1b*; tumour necrosis factor- $\alpha$ , *Tnfa*; integrin subunit alpha M, *Itgam*). Data are displayed as means  $\pm$  SD. In case of normal distribution Student's *t*-test was chosen for statistical analysis, otherwise a Mann-Whitney test was performed. Significant differences between groups are marked by asterisks: \*\* *p* < 0.01, \*\*\* *p* < 0.001.
